# Supplementary material for: Mechanisms of different response to ionizing irradiation in isogenic head and neck cancer cell lines
Source: PubMed Central journal article supplement (PMC6882348; doi:10.1186/s13014-019-1418-6), 2019-11-27

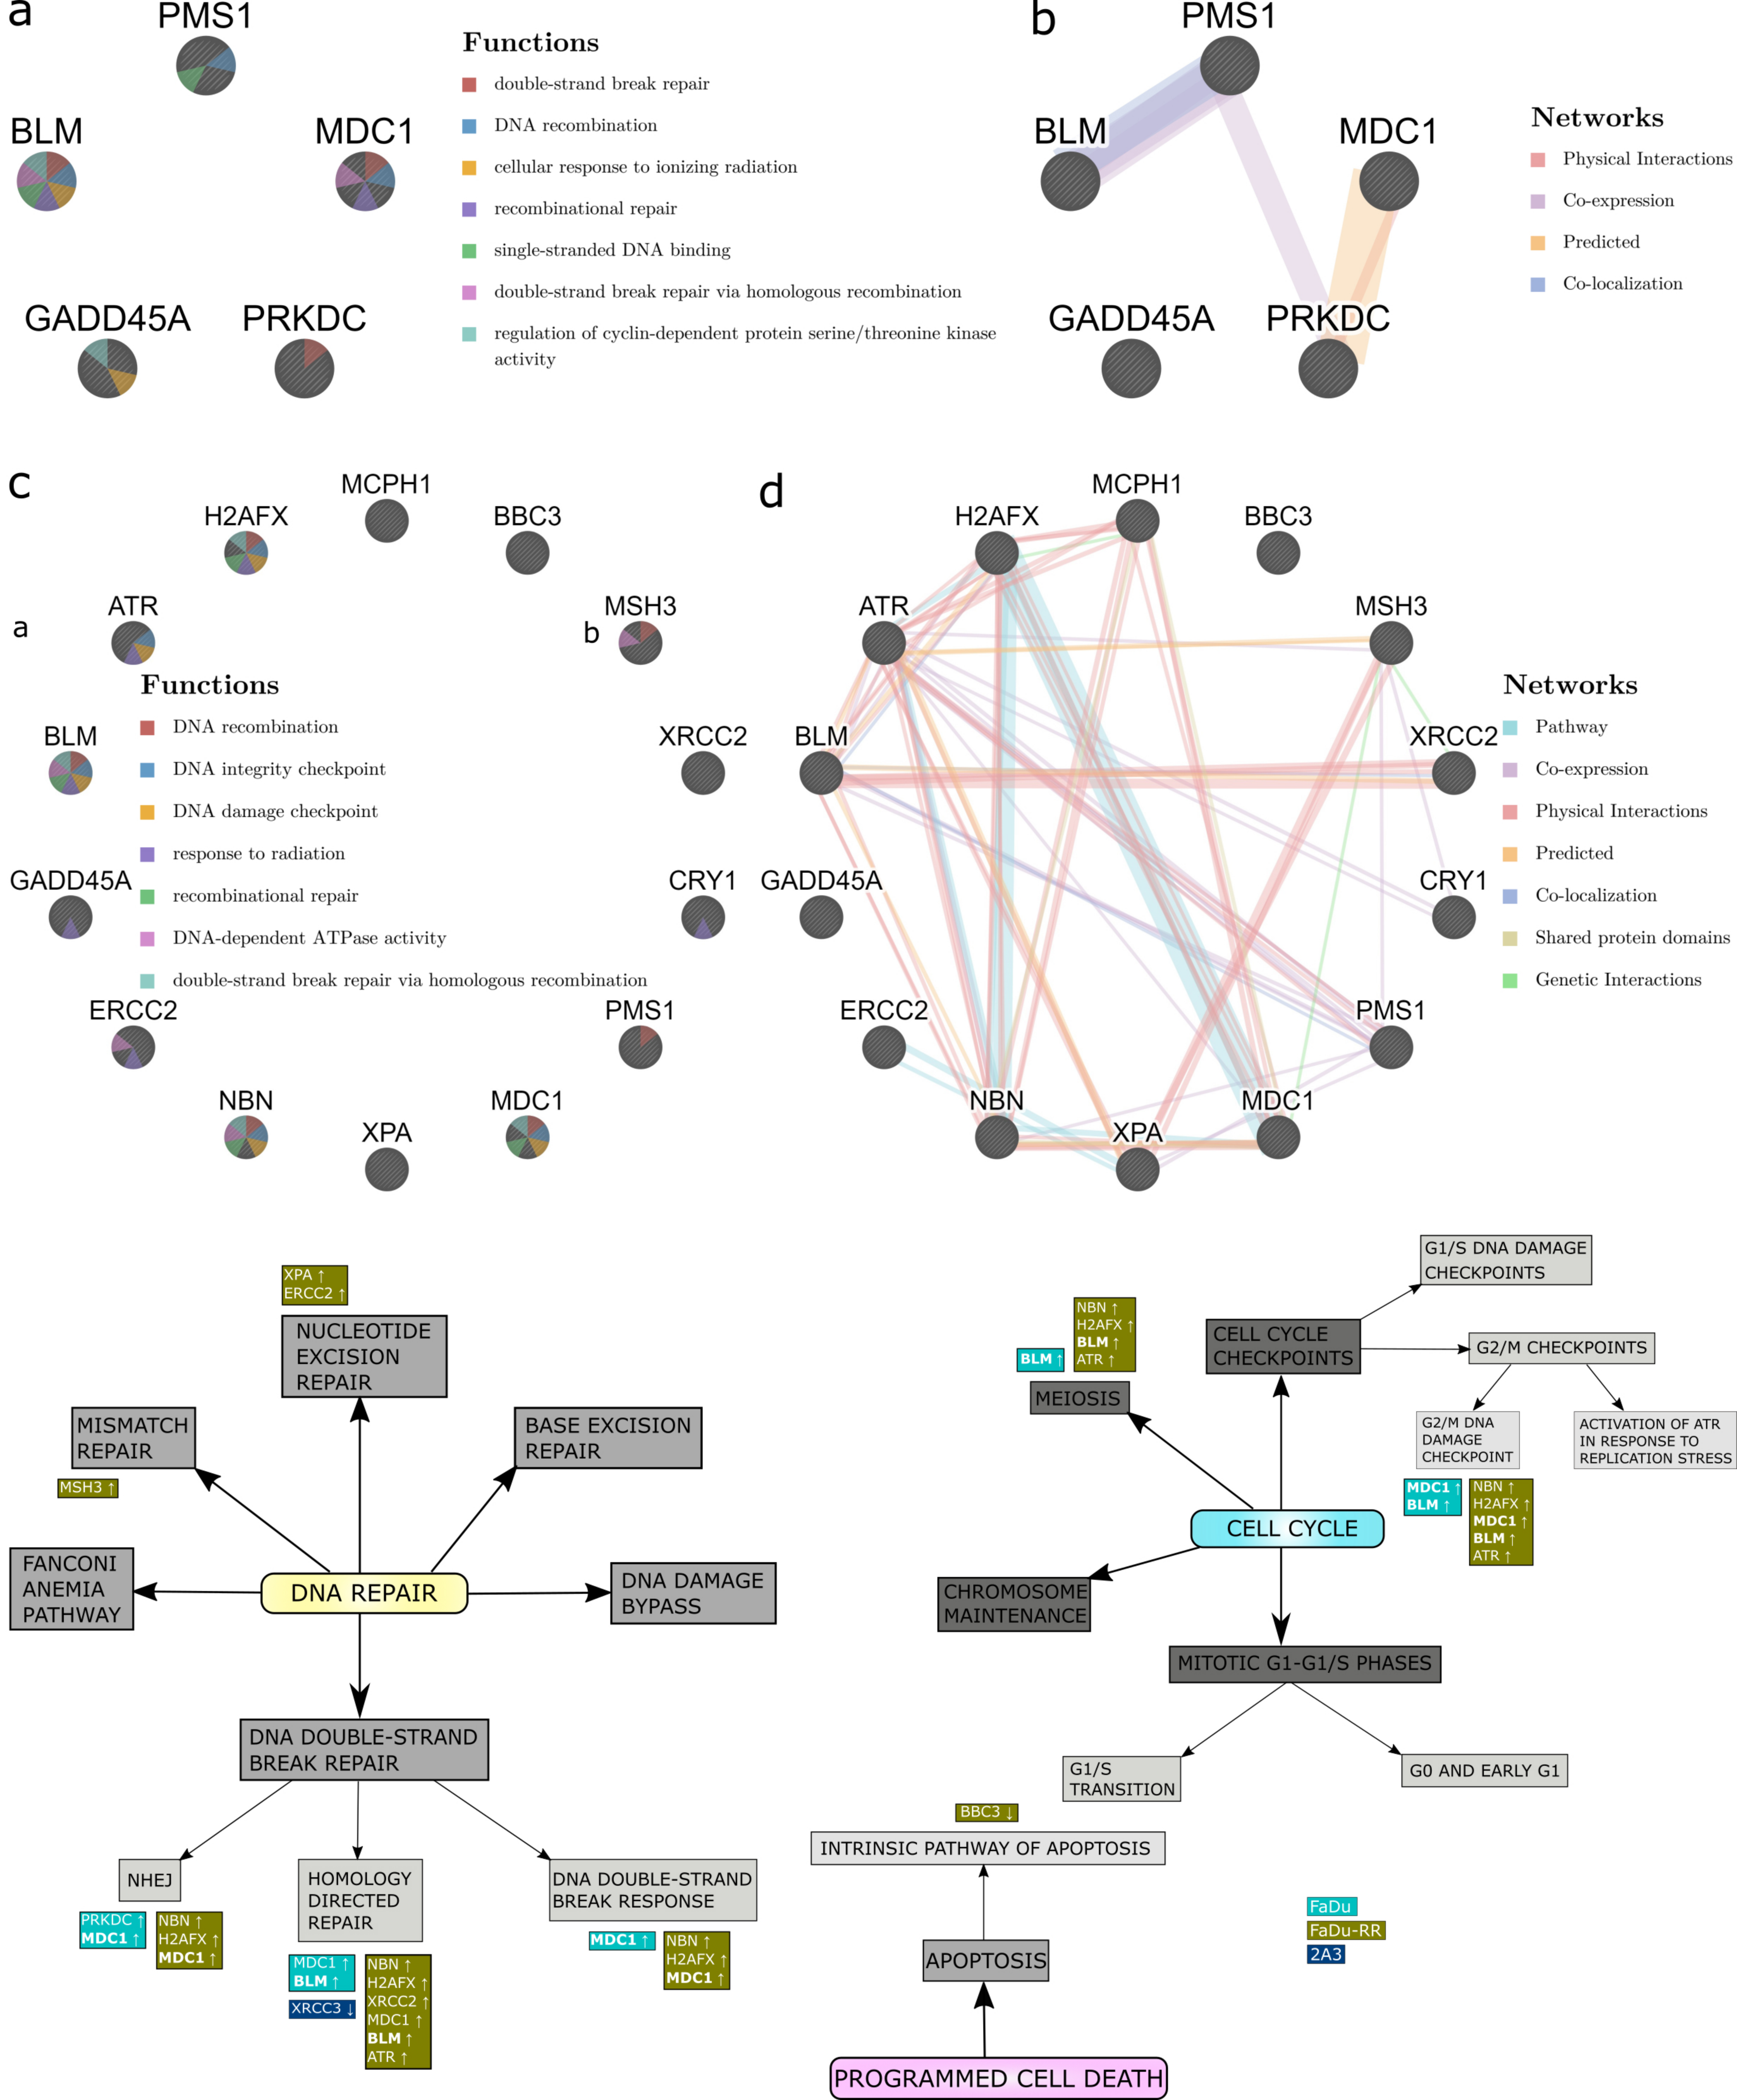

Supplement: 13014_2019_1418_MOESM13_ESM.pdf [file 13014_2019_1418_MOESM13_ESM.pdf]
