# Supplementary material for: Mechanisms of different response to ionizing irradiation in isogenic head and neck cancer cell lines
Source: Springer Nature journal article supplement (doi:10.1186/s13014-019-1418-6), 2019-11-27
Supplement: MOESM2 [file 17440296]

FINAL REPORT OF LABORATORY EXAMINATION

Mörikestr. 28/3, D 71636 Ludwigsburg, Germany

+49 (0)7141 64 83585

[idxxbioanalytics-europe@idexx.com](mailto:idxxbioanalytics-europe@idexx.com)

[www.idexxbioanalytics.eu/](http://www.idexxbioanalytics.eu/)

IDEXX BioAnalytics Case # 63645-2019

Received: 7/23/2019

Completed: 7/31/2019

**Submitted By**

Vesna Todorovic  
 Institute of Oncology Ljubljana  
 Department of Experimental Oncology  
 Zaloska 2  
 Ljubljana SI-1000  
 Slovenia

Phone: 38615879437

Email: [vtodorovic@onko-i.si](mailto:vtodorovic@onko-i.si); [Idexx-radil-results@idexx.com](mailto:Idexx-radil-results@idexx.com)

**Specimen Description**

Species: human

Description: Cells

Number of Specimens/Animals: 11

| ID | Client ID    | Cell Line    | Species | ATCC #   | Other 1                   | Specimen |
|----|--------------|--------------|---------|----------|---------------------------|----------|
| 1  | 2A3          | 2A3          | human   | CRL-3212 | (HPV) DNA sequences       | cell     |
| 2  | HepG2        | HepG2        | human   | HB-8065  |                           | cell     |
| 3  | SKMEL-28     | SKMEL-28     | human   | HTB-72   |                           | cell     |
| 4  | PC3          | PC3          | human   | CRL-1435 |                           | cell     |
| 5  | DU-145       | DU-145       | human   | HTB-81   |                           | cell     |
| 6  | Caco-2       | Caco-2       | human   | HTB-37   |                           | cell     |
| 7  | HT29-MTX-E12 | HT29-MTX-E12 | human   |          | ECACC 12040401            | cell     |
| 8  | LoVo         | LoVo         | human   | CCL-229  |                           | cell     |
| 9  | Wi-38        | Wi-38        | human   | CCL-75   |                           | cell     |
| 10 | HUVEC        | HUVEC        | human   | CRL-1730 |                           | cell     |
| 11 | HMEC-1       | HMEC-1       | human   | CRL-3243 | Biosafety level 2 (SV-40) | cell     |

**Services/Tests Performed:** CellCheck 9 - human (9 Marker STR Profile and Inter-species Contamination Test) (1-11)

**Genetic evaluation for:** Human 9-Marker STR Profile, Interspecies Contamination Test

**Summary:** Cell Check results are provided in the data results section for each sample. For human samples, an identity matching score above 80% indicates the sample is consistent with the cell line of origin. For human samples with less than an 80% matching score, please see individual comments for these samples in the detail section.

Please see the report for details.

## CELL CHECK

### Species-specific PCR Evaluation

| Species              | 1 | 2 | 3 | 4 | 5 | 6 | 7 | 8 | 9 | 10 |
|----------------------|---|---|---|---|---|---|---|---|---|----|
| mouse                | - | - | - | - | - | - | - | - | - | -  |
| rat                  | - | - | - | - | - | - | - | - | - | -  |
| human                | + | + | + | + | + | + | + | + | + | +  |
| Chinese hamster      | - | - | - | - | - | - | - | - | - | -  |
| African green monkey | - | - | - | - | - | - | - | - | - | -  |

| Species              | 11 |
|----------------------|----|
| mouse                | -  |
| rat                  | -  |
| human                | +  |
| Chinese hamster      | -  |
| African green monkey | -  |

### Marker Analysis

| Marker Name    | 1              |                      | 2              |                        | 3              |                          | 4              |                       | 5              |                       | 6              |                       |
|----------------|----------------|----------------------|----------------|------------------------|----------------|--------------------------|----------------|-----------------------|----------------|-----------------------|----------------|-----------------------|
|                | Sample Results | 2A3 (ATCC# CRL-3212) | Sample Results | Hep G2 (ATCC# HB-8065) | Sample Results | SK-Mel-28 (ATCC# HTB-72) | Sample Results | PC-3 (ATCC# CRL-1435) | Sample Results | DU-145 (ATCC# HTB-81) | Sample Results | CaCo-2 (ATCC# HTB-37) |
| AMEL           | NP             | NA                   | X, Y           | X, Y                   | X, Y           | X, Y                     | X              | X                     | X, Y           | X, Y                  | X              | X                     |
| CSF1PO         | 12             | 12                   | 10, 11         | 10, 11                 | 10, 12         | 10, 12                   | 11             | 11                    | 10, 11         | 10, 11                | 11             | 11                    |
| D13S317        | 8, 9           | 8, 9                 | 9, 13          | 9, 13                  | 11, 12         | 11, 12                   | 11             | 11                    | 12, 14         | 12, 13, 14            | 11, 13, 14     | 11, 13, 14            |
| D16S539        | 11             | 11                   | 12, 13         | 12, 13                 | 9, 12          | 9, 12                    | 11             | 11                    | 11, 12, 13     | 11, 13                | 12, 13         | 12, 13                |
| D5S818         | 12             | 12                   | 11, 12         | 11, 12                 | 11, 13         | 11, 13                   | 13             | 13                    | 10, 13         | 10, 13                | 12, 13         | 12, 13                |
| D7S820         | 11, 12         | 11, 12               | 10             | 10                     | 9, 3, 10       | 9, 3, 10                 | 8              | 8, 11                 | 7, 10, 11      | 7, 10, 11             | 11, 12         | 11, 12                |
| TH01           | 8              | 8                    | 9              | 9                      | 7              | 7                        | 6, 7           | 6, 7                  | 7              | 7                     | 6              | 6                     |
| TPOX           | 11             | 11                   | 8, 9           | 8, 9                   | 8, 12          | 8, 12                    | 8, 9           | 8, 9                  | 11             | 11                    | 9, 11          | 9, 11                 |
| vWA            | 15, 17         | 15, 17               | 17             | 17                     | 19             | 16, 19                   | 17             | 17                    | 17, 18         | 17, 18, 19            | 16, 18         | 16, 18                |
| Identity Match | 100%           |                      | 100%           |                        | > 80%          |                          | > 80%          |                       | > 80%          |                       | 100%           |                       |

| Marker Name | 7              |                      | 8              |                      | 9              |                      | 10             |                           | 11             |                         |
|-------------|----------------|----------------------|----------------|----------------------|----------------|----------------------|----------------|---------------------------|----------------|-------------------------|
|             | Sample Results | HT-29 (ATCC# HTB-38) | Sample Results | LoVo (ATCC# CCL-229) | Sample Results | WI-38 (ATCC# CCL-75) | Sample Results | HUV-EC-C (ATCC# CRL-1730) | Sample Results | HMEC-1 (ATCC# CRL-3243) |
| AMEL        | X              | X                    | X, Y           | X, Y                 | X              | X                    | X              | X                         | X, Y           | X, Y                    |
| CSF1PO      | 11, 12         | 11, 12               | 11, 13, 14     | 10, 11, 13, 14       | 10, 12         | 10, 12               | 12             | 11, 12                    | 10, 12         | 10, 12                  |
| D13S317     | 11             | 11, 12               | 8, 11          | 8, 11                | 11             | 11                   | 12             | 9, 11                     | 12             | 11, 12                  |
| D16S539     | 11, 12         | 11, 12               | 9, 12          | 9, 12                | 11, 12         | 11, 12               | 9              | 11, 12                    | 11, 12         | 11, 12                  |

| Marker Name    | 7              |                      | 8              |                      | 9              |                      | 10                  |                           | 11             |                         |
|----------------|----------------|----------------------|----------------|----------------------|----------------|----------------------|---------------------|---------------------------|----------------|-------------------------|
|                | Sample Results | HT-29 (ATCC# HTB-38) | Sample Results | LoVo (ATCC# CCL-229) | Sample Results | WI-38 (ATCC# CCL-75) | Sample Results      | HUV-EC-C (ATCC# CRL-1730) | Sample Results | HMEC-1 (ATCC# CRL-3243) |
| D5S818         | 11, 12         | 11, 12               | 11, 13         | 11, 12, 13           | 10             | 10                   | 10                  | 11, 12                    | 12, 13         | 12                      |
| D7S820         | 10             | 10                   | 9.3, 10, 11    | 9.3, 10, 11          | 9, 11          | 9, 11                | 10, 11              | 8, 12                     | 8, 10          | 8, 10                   |
| TH01           | 6              | 6, 9                 | 9.3            | 9.3                  | 9.3            | 9.3                  | 6                   | 6, 9.3                    | 7              | 7                       |
| TPOX           | 8, 9           | 8, 9                 | 8, 9           | 8, 9                 | 8              | 8                    | 8, 11               | 8, 11                     | 8, 11          | 8, 11                   |
| vWA            | 17             | 17, 19               | 17, 18         | 17, 18               | 19, 20         | 19, 20               | 17                  | 16                        | 15, 17         | 15, 17                  |
| Identity Match | > 80%          |                      | > 80%          |                      | 100%           |                      | < 80%, see comments |                           | > 80%          |                         |

| Sample ID | Remarks                                                                                                                                                                                                                                                                                                          |
|-----------|------------------------------------------------------------------------------------------------------------------------------------------------------------------------------------------------------------------------------------------------------------------------------------------------------------------|
| 10        | The genetic profile is not consistent with the genetic profile reported for the HUV-EC-C cell line (ATCC# CRL-1730). The sample profile is identical to the genetic profile reported for the ECV-304 cell line (ATCC# CRL-1998) and HBMEC-2 cell line (ATCC# CRL-3023). This sample appears to be misidentified. |
