# Supplementary material for: Mechanisms of different response to ionizing irradiation in isogenic head and neck cancer cell lines
Source: Springer Nature journal article supplement (doi:10.1186/s13014-019-1418-6), 2019-11-27
Supplement: MOESM5 [file 17440296]

**Table S1.** A list of genes included on RT<sup>2</sup> Profiler™ PCR Array Human DNA Damage Signaling Pathway (PAHS-029Z, Qiagen).

| Unigene   | Refseq    | Symbol         | Description                                                                                                                     | RT2 Catalog               |
|-----------|-----------|----------------|---------------------------------------------------------------------------------------------------------------------------------|---------------------------|
| Hs.431048 | NM_005157 | <i>ABL1</i>    | C-abl oncogene 1, non-receptor tyrosine kinase                                                                                  | <a href="#">PPH00087E</a> |
| Hs.73722  | NM_080649 | <i>APEX1</i>   | APEX nuclease (multifunctional DNA repair enzyme) 1                                                                             | <a href="#">PPH02201A</a> |
| Hs.367437 | NM_000051 | <i>ATM</i>     | Ataxia telangiectasia mutated                                                                                                   | <a href="#">PPH00325C</a> |
| Hs.271791 | NM_001184 | <i>ATR</i>     | Ataxia telangiectasia and Rad3 related                                                                                          | <a href="#">PPH01318B</a> |
| Hs.694840 | NM_032166 | <i>ATRIP</i>   | ATR interacting protein                                                                                                         | <a href="#">PPH66805A</a> |
| Hs.533526 | NM_000489 | <i>ATRX</i>    | Alpha thalassemia/mental retardation syndrome X-linked                                                                          | <a href="#">PPH00470F</a> |
| Hs.591642 | NM_000465 | <i>BARD1</i>   | BRCA1 associated RING domain 1                                                                                                  | <a href="#">PPH09451A</a> |
| Hs.624291 | NM_004324 | <i>BAX</i>     | BCL2-associated X protein                                                                                                       | <a href="#">PPH00078B</a> |
| Hs.467020 | NM_014417 | <i>BBC3</i>    | BCL2 binding component 3                                                                                                        | <a href="#">PPH02204C</a> |
| Hs.725208 | NM_000057 | <i>BLM</i>     | Bloom syndrome, RecQ helicase-like                                                                                              | <a href="#">PPH02711B</a> |
| Hs.194143 | NM_007294 | <i>BRCA1</i>   | Breast cancer 1, early onset                                                                                                    | <a href="#">PPH00322F</a> |
| Hs.128903 | NM_032043 | <i>BRIP1</i>   | BRCA1 interacting protein C-terminal helicase 1                                                                                 | <a href="#">PPH10375A</a> |
| Hs.437705 | NM_001789 | <i>CDC25A</i>  | Cell division cycle 25 homolog A ( <i>S. pombe</i> )                                                                            | <a href="#">PPH00930A</a> |
| Hs.656    | NM_001790 | <i>CDC25C</i>  | Cell division cycle 25 homolog C ( <i>S. pombe</i> )                                                                            | <a href="#">PPH02198F</a> |
| Hs.184298 | NM_001799 | <i>CDK7</i>    | Cyclin-dependent kinase 7                                                                                                       | <a href="#">PPH00935E</a> |
| Hs.370771 | NM_000389 | <i>CDKN1A</i>  | Cyclin-dependent kinase inhibitor 1A (p21, Cip1)                                                                                | <a href="#">PPH00211E</a> |
| Hs.24529  | NM_001274 | <i>CHEK1</i>   | CHK1 checkpoint homolog ( <i>S. pombe</i> )                                                                                     | <a href="#">PPH00940C</a> |
| Hs.291363 | NM_007194 | <i>CHEK2</i>   | CHK2 checkpoint homolog ( <i>S. pombe</i> )                                                                                     | <a href="#">PPH00921B</a> |
| Hs.715556 | NM_006384 | <i>CIB1</i>    | Calcium and integrin binding 1 (calmyrin)                                                                                       | <a href="#">PPH12320C</a> |
| Hs.151573 | NM_004075 | <i>CRY1</i>    | Cryptochrome 1 (photolyase-like)                                                                                                | <a href="#">PPH06231B</a> |
| Hs.82201  | NM_001896 | <i>CSNK2A2</i> | Casein kinase 2, alpha prime polypeptide                                                                                        | <a href="#">PPH02197F</a> |
| Hs.290758 | NM_001923 | <i>DDB1</i>    | Damage-specific DNA binding protein 1, 127kDa                                                                                   | <a href="#">PPH01515A</a> |
| Hs.700338 | NM_000107 | <i>DDB2</i>    | Damage-specific DNA binding protein 2, 48kDa                                                                                    | <a href="#">PPH01726A</a> |
| Hs.505777 | NM_004083 | <i>DDIT3</i>   | DNA-damage-inducible transcript 3                                                                                               | <a href="#">PPH00310A</a> |
| Hs.435981 | NM_001983 | <i>ERCC1</i>   | Excision repair cross-complementing rodent repair deficiency, complementation group 1 (includes overlapping antisense sequence) | <a href="#">PPH01539A</a> |
| Hs.487294 | NM_000400 | <i>ERCC2</i>   | Excision repair cross-complementing rodent repair deficiency, complementation group 2                                           | <a href="#">PPH01550C</a> |
| Hs.498248 | NM_130398 | <i>EXO1</i>    | Exonuclease 1                                                                                                                   | <a href="#">PPH02715A</a> |
| Hs.744083 | NM_000135 | <i>FANCA</i>   | Fanconi anemia, complementation group A                                                                                         | <a href="#">PPH15968E</a> |

|           |           |                 |                                                                       |                           |
|-----------|-----------|-----------------|-----------------------------------------------------------------------|---------------------------|
| Hs.208388 | NM_033084 | <i>FANCD2</i>   | Fanconi anemia, complementation group D2                              | <a href="#">PPH14413A</a> |
| Hs.591084 | NM_004629 | <i>FANCG</i>    | Fanconi anemia, complementation group G                               | <a href="#">PPH20387A</a> |
| Hs.409065 | NM_004111 | <i>FEN1</i>     | Flap structure-specific endonuclease 1                                | <a href="#">PPH00502B</a> |
| Hs.80409  | NM_001924 | <i>GADD45A</i>  | Growth arrest and DNA-damage-inducible, alpha                         | <a href="#">PPH00148B</a> |
| Hs.9701   | NM_006705 | <i>GADD45G</i>  | Growth arrest and DNA-damage-inducible, gamma                         | <a href="#">PPH02207A</a> |
| Hs.477879 | NM_002105 | <i>H2AFX</i>    | H2A histone family, member X                                          | <a href="#">PPH12636B</a> |
| Hs.152983 | NM_004507 | <i>HUS1</i>     | HUS1 checkpoint homolog (S. pombe)                                    | <a href="#">PPH00922B</a> |
| Hs.1770   | NM_000234 | <i>LIG1</i>     | Ligase I, DNA, ATP-dependent                                          | <a href="#">PPH02094A</a> |
| Hs.432642 | NM_002969 | <i>MAPK12</i>   | Mitogen-activated protein kinase 12                                   | <a href="#">PPH01779A</a> |
| Hs.35947  | NM_003925 | <i>MBD4</i>     | Methyl-CpG binding domain protein 4                                   | <a href="#">PPH02709A</a> |
| Hs.593807 | NM_024596 | <i>MCPH1</i>    | Microcephalin 1                                                       | <a href="#">PPH14515B</a> |
| Hs.653495 | NM_014641 | <i>MDC1</i>     | Mediator of DNA-damage checkpoint 1                                   | <a href="#">PPH20213B</a> |
| Hs.195364 | NM_000249 | <i>MLH1</i>     | MutL homolog 1, colon cancer, nonpolyposis type 2 (E. coli)           | <a href="#">PPH00196F</a> |
| Hs.436650 | NM_014381 | <i>MLH3</i>     | MutL homolog 3 (E. coli)                                              | <a href="#">PPH02700A</a> |
| Hs.459596 | NM_002434 | <i>MPG</i>      | N-methylpurine-DNA glycosylase                                        | <a href="#">PPH02102A</a> |
| Hs.192649 | NM_005590 | <i>MRE11A</i>   | MRE11 meiotic recombination 11 homolog A (S. cerevisiae)              | <a href="#">PPH01097C</a> |
| Hs.597656 | NM_000251 | <i>MSH2</i>     | MutS homolog 2, colon cancer, nonpolyposis type 1 (E. coli)           | <a href="#">PPH00197E</a> |
| Hs.648635 | NM_002439 | <i>MSH3</i>     | MutS homolog 3 (E. coli)                                              | <a href="#">PPH02195A</a> |
| Hs.492208 | NM_002485 | <i>NBN</i>      | Nibrin                                                                | <a href="#">PPH00946C</a> |
| Hs.66196  | NM_002528 | <i>NTHL1</i>    | Nth endonuclease III-like 1 (E. coli)                                 | <a href="#">PPH02720A</a> |
| Hs.380271 | NM_002542 | <i>OGG1</i>     | 8-oxoguanine DNA glycosylase                                          | <a href="#">PPH02103A</a> |
| Hs.177766 | NM_001618 | <i>PARP1</i>    | Poly (ADP-ribose) polymerase 1                                        | <a href="#">PPH00686B</a> |
| Hs.147433 | NM_182649 | <i>PCNA</i>     | Proliferating cell nuclear antigen                                    | <a href="#">PPH00216B</a> |
| Hs.111749 | NM_000534 | <i>PMS1</i>     | PMS1 postmeiotic segregation increased 1 (S. cerevisiae)              | <a href="#">PPH02155B</a> |
| Hs.715590 | NM_000535 | <i>PMS2</i>     | PMS2 postmeiotic segregation increased 2 (S. cerevisiae)              | <a href="#">PPH02095E</a> |
| Hs.78016  | NM_007254 | <i>PNKP</i>     | Polynucleotide kinase 3'-phosphatase                                  | <a href="#">PPH02725A</a> |
| Hs.286073 | NM_003620 | <i>PPM1D</i>    | Protein phosphatase, Mg <sup>2+</sup> /Mn <sup>2+</sup> dependent, 1D | <a href="#">PPH02151A</a> |
| Hs.631593 | NM_014330 | <i>PPP1R15A</i> | Protein phosphatase 1, regulatory (inhibitor) subunit 15A             | <a href="#">PPH02081E</a> |
| Hs.491682 | NM_006904 | <i>PRKDC</i>    | Protein kinase, DNA-activated, catalytic polypeptide                  | <a href="#">PPH01309C</a> |
| Hs.38114  | NM_002853 | <i>RAD1</i>     | RAD1 homolog (S. pombe)                                               | <a href="#">PPH00741F</a> |
| Hs.16184  | NM_002873 | <i>RAD17</i>    | RAD17 homolog (S. pombe)                                              | <a href="#">PPH00929F</a> |
| Hs.375684 | NM_020165 | <i>RAD18</i>    | RAD18 homolog (S. cerevisiae)                                         | <a href="#">PPH02740A</a> |
| Hs.81848  | NM_006265 | <i>RAD21</i>    | RAD21 homolog (S. pombe)                                              | <a href="#">PPH10216A</a> |

|           |           |                |                                                                        |                           |
|-----------|-----------|----------------|------------------------------------------------------------------------|---------------------------|
| Hs.633509 | NM_005732 | <i>RAD50</i>   | RAD50 homolog ( <i>S. cerevisiae</i> )                                 | <a href="#">PPH00956B</a> |
| Hs.631709 | NM_002875 | <i>RAD51</i>   | RAD51 homolog ( <i>S. cerevisiae</i> )                                 | <a href="#">PPH00942F</a> |
| Hs.172587 | NM_133509 | <i>RAD51B</i>  | RAD51 homolog B ( <i>S. cerevisiae</i> )                               | <a href="#">PPH02654B</a> |
| Hs.655354 | NM_004584 | <i>RAD9A</i>   | RAD9 homolog A ( <i>S. pombe</i> )                                     | <a href="#">PPH00944C</a> |
| Hs.546282 | NM_002894 | <i>RBBP8</i>   | Retinoblastoma binding protein 8                                       | <a href="#">PPH00954F</a> |
| Hs.443077 | NM_016316 | <i>REV1</i>    | REV1 homolog ( <i>S. cerevisiae</i> )                                  | <a href="#">PPH21080A</a> |
| Hs.250648 | NM_152617 | <i>RNF168</i>  | Ring finger protein 168                                                | <a href="#">PPH14759A</a> |
| Hs.485278 | NM_183078 | <i>RNF8</i>    | Ring finger protein 8                                                  | <a href="#">PPH08534A</a> |
| Hs.461925 | NM_002945 | <i>RPA1</i>    | Replication protein A1, 70kDa                                          | <a href="#">PPH02730A</a> |
| Hs.369779 | NM_012238 | <i>SIRT1</i>   | Sirtuin 1                                                              | <a href="#">PPH02188A</a> |
| Hs.211602 | NM_006306 | <i>SMC1A</i>   | Structural maintenance of chromosomes 1A                               | <a href="#">PPH14489A</a> |
| Hs.81424  | NM_003352 | <i>SUMO1</i>   | SMT3 suppressor of mif two 3 homolog 1 ( <i>S. cerevisiae</i> )        | <a href="#">PPH00973F</a> |
| Hs.593379 | NM_007027 | <i>TOPBP1</i>  | Topoisomerase (DNA) II binding protein 1                               | <a href="#">PPH10470A</a> |
| Hs.437460 | NM_000546 | <i>TP53</i>    | Tumor protein p53                                                      | <a href="#">PPH00213F</a> |
| Hs.440968 | NM_005657 | <i>TP53BP1</i> | Tumor protein p53 binding protein 1                                    | <a href="#">PPH02165A</a> |
| Hs.192132 | NM_005427 | <i>TP73</i>    | Tumor protein p73                                                      | <a href="#">PPH00725A</a> |
| Hs.191334 | NM_003362 | <i>UNG</i>     | Uracil-DNA glycosylase                                                 | <a href="#">PPH01727E</a> |
| Hs.654364 | NM_000380 | <i>XPA</i>     | Xeroderma pigmentosum, complementation group A                         | <a href="#">PPH01524C</a> |
| Hs.475538 | NM_004628 | <i>XPC</i>     | Xeroderma pigmentosum, complementation group C                         | <a href="#">PPH01536F</a> |
| Hs.98493  | NM_006297 | <i>XRCC1</i>   | X-ray repair complementing defective repair in Chinese hamster cells 1 | <a href="#">PPH01741A</a> |
| Hs.647093 | NM_005431 | <i>XRCC2</i>   | X-ray repair complementing defective repair in Chinese hamster cells 2 | <a href="#">PPH01694A</a> |
| Hs.592325 | NM_005432 | <i>XRCC3</i>   | X-ray repair complementing defective repair in Chinese hamster cells 3 | <a href="#">PPH02208A</a> |
| Hs.292493 | NM_001469 | <i>XRCC6</i>   | X-ray repair complementing defective repair in Chinese hamster cells 6 | <a href="#">PPH02175A</a> |
| Hs.520640 | NM_001101 | <i>ACTB</i>    | Actin, beta                                                            | <a href="#">PPH00073G</a> |
| Hs.534255 | NM_004048 | <i>B2M</i>     | Beta-2-microglobulin                                                   | <a href="#">PPH01094E</a> |
| Hs.592355 | NM_002046 | <i>GAPDH</i>   | Glyceraldehyde-3-phosphate dehydrogenase                               | <a href="#">PPH00150F</a> |
| Hs.412707 | NM_000194 | <i>HPRT1</i>   | Hypoxanthine phosphoribosyltransferase 1                               | <a href="#">PPH01018C</a> |
| Hs.546285 | NM_001002 | <i>RPLP0</i>   | Ribosomal protein, large, P0                                           | <a href="#">PPH21138F</a> |
| N/A       | SA_00105  | HGDC           | Human Genomic DNA Contamination                                        |                           |
| N/A       | SA_00104  | RTC            | Reverse Transcription Control                                          | <a href="#">PPX63340A</a> |
| N/A       | SA_00104  | RTC            | Reverse Transcription Control                                          | <a href="#">PPX63340A</a> |
| N/A       | SA_00104  | RTC            | Reverse Transcription Control                                          | <a href="#">PPX63340A</a> |
