# Supplementary material for: Mechanisms of different response to ionizing irradiation in isogenic head and neck cancer cell lines
Source: Springer Nature journal article supplement (doi:10.1186/s13014-019-1418-6), 2019-11-27
Supplement: MOESM8 [file 17440296]

**Table S3.** Percentage of early and late apoptotic cells in control non-irradiated isogenic cells.

| Time (h) | Early apoptotic cells (% ± SEM) |           |           | Late apoptotic cells (% ± SEM) |            |           |
|----------|---------------------------------|-----------|-----------|--------------------------------|------------|-----------|
|          | FaDu                            | FaDu-RR   | 2A3       | FaDu                           | FaDu-RR    | 2A3       |
| 5        | 3.0 ± 0.6                       | 2.0 ± 0.7 | 2.0 ± 0.3 | 6.7 ± 0.9                      | 8.4 ± 2.1* | 6.1 ± 0.7 |
| 24       | 2.9 ± 0.4                       | 2.1 ± 0.4 | 2.0 ± 0.2 | 4.6 ± 0.2                      | 5.5 ± 0.8  | 4.7 ± 0.8 |
| 48       | 2.3 ± 0.9                       | 1.5 ± 0.2 | 2.0 ± 0.3 | 3.3 ± 0.9                      | 4.0 ± 1.0  | 4.5 ± 1.0 |
| 72       | 5.9 ± 0.5**                     | 2.1 ± 0.3 | 2.5 ± 0.3 | 4.8 ± 0.5                      | 3.2 ± 0.4  | 4.6 ± 1.0 |

\*\* significant difference compared to FaDu 5, 24, and 48 h. \* significant difference compared to FaDu-RR 72 h.

Values are AM ± SEM.
