# Supplementary material for: Mechanisms of different response to ionizing irradiation in isogenic head and neck cancer cell lines
Source: Springer Nature journal article supplement (doi:10.1186/s13014-019-1418-6), 2019-11-27

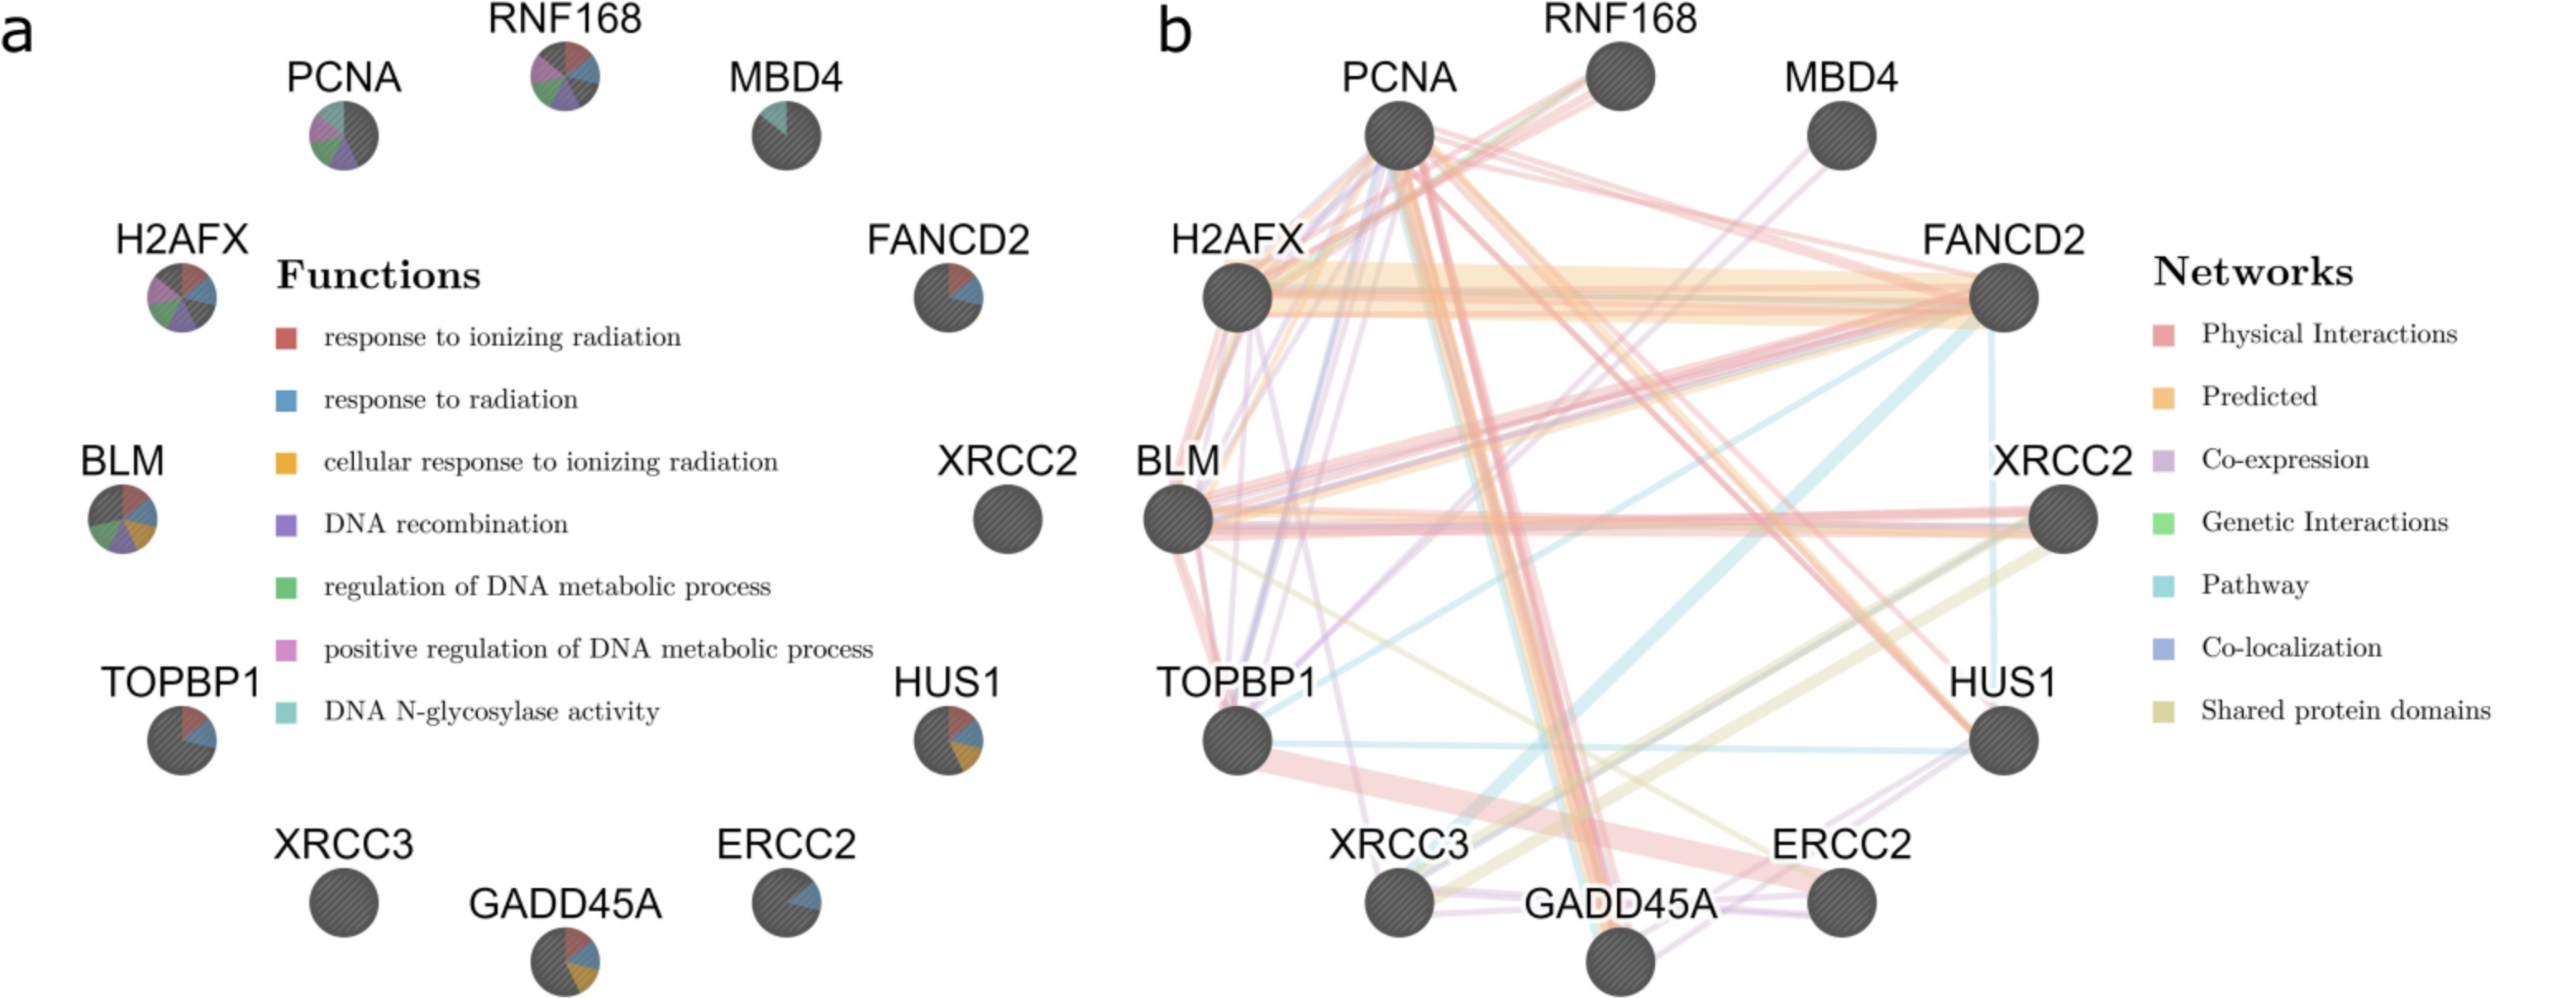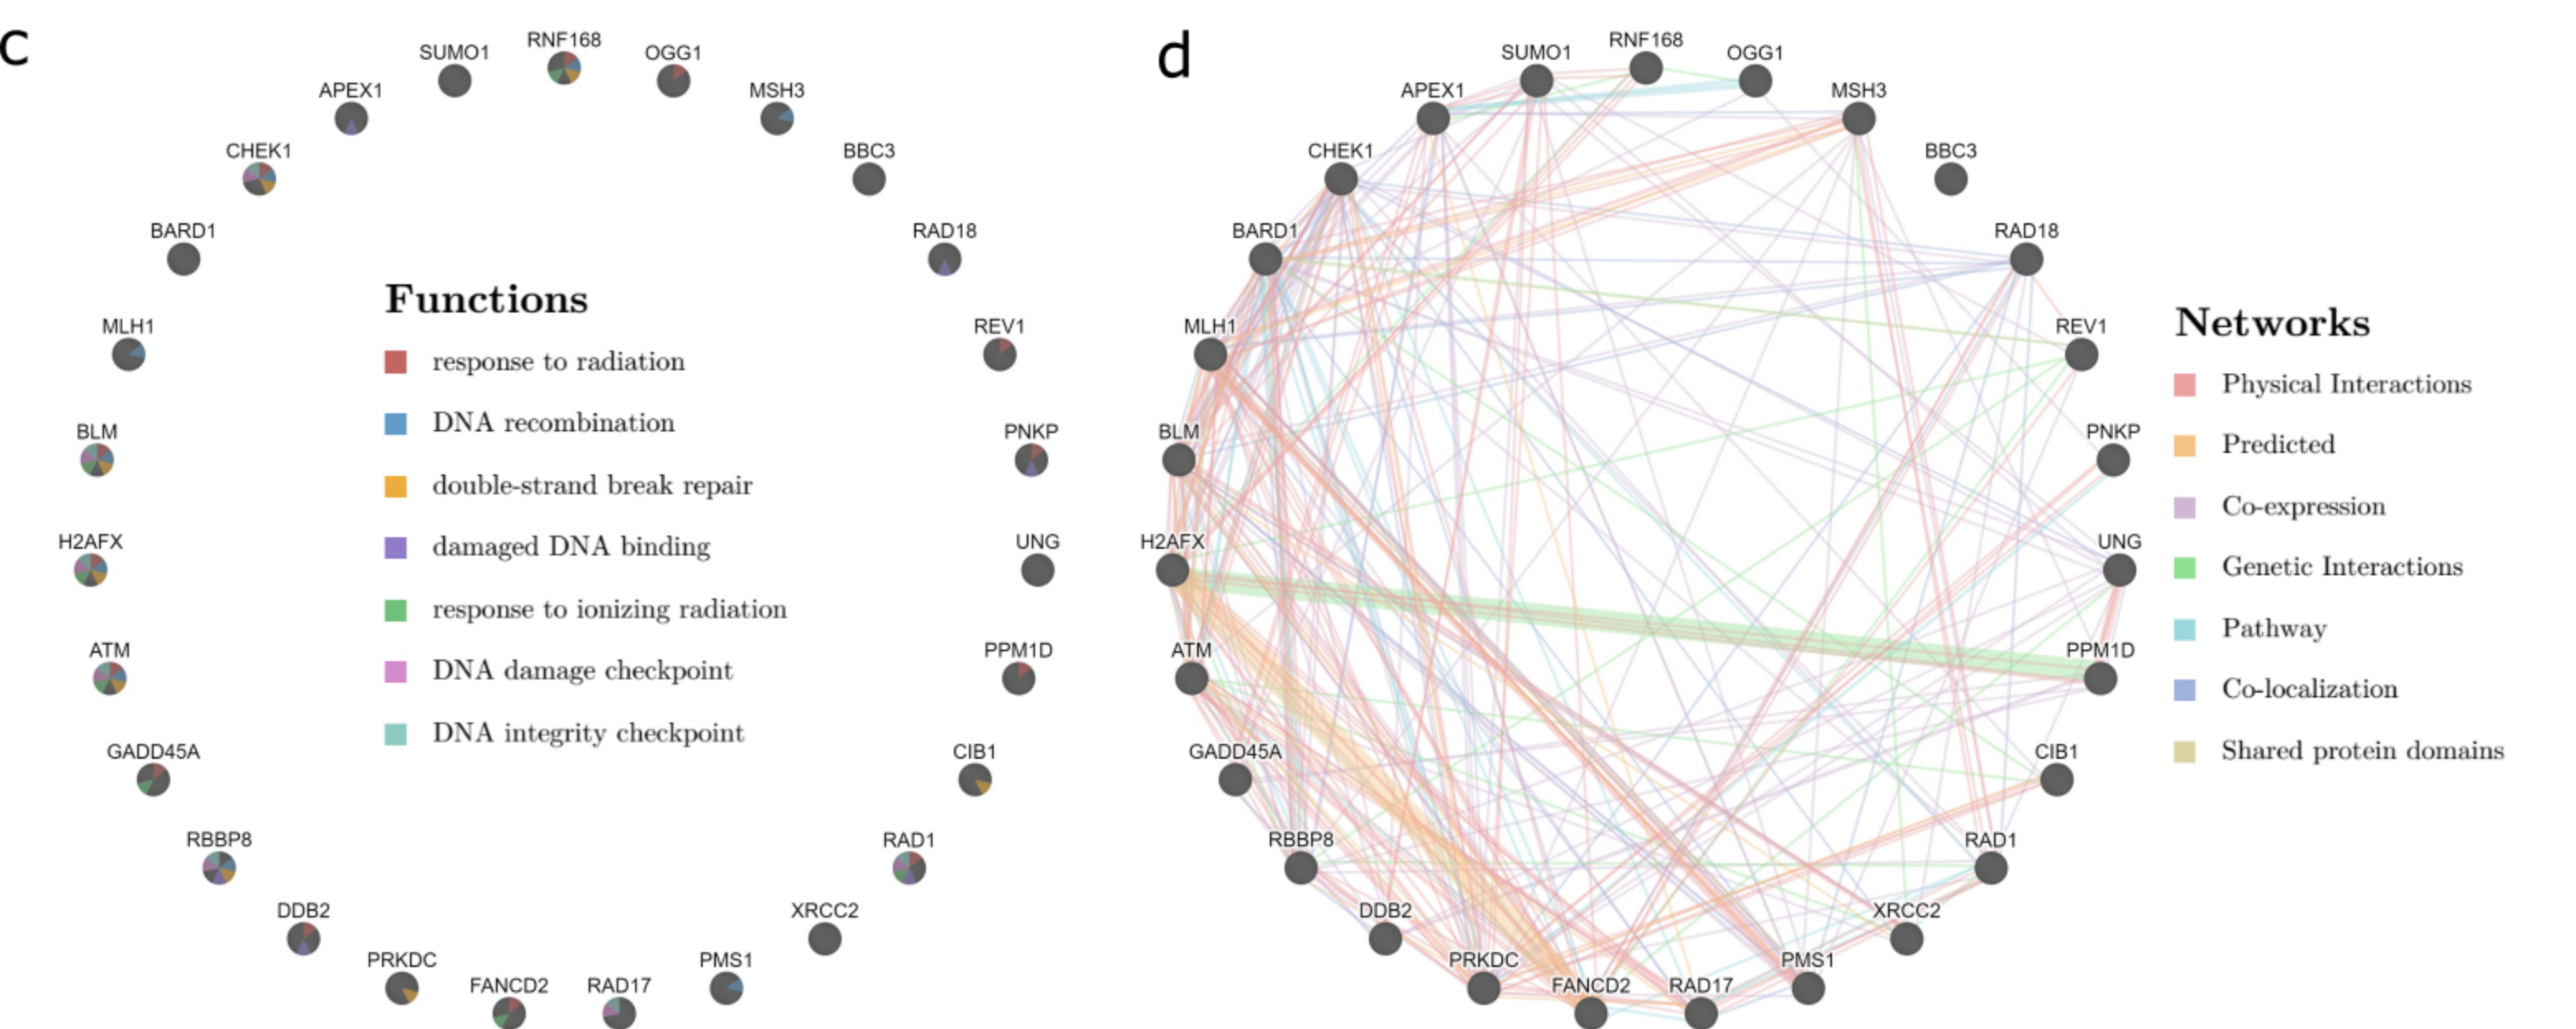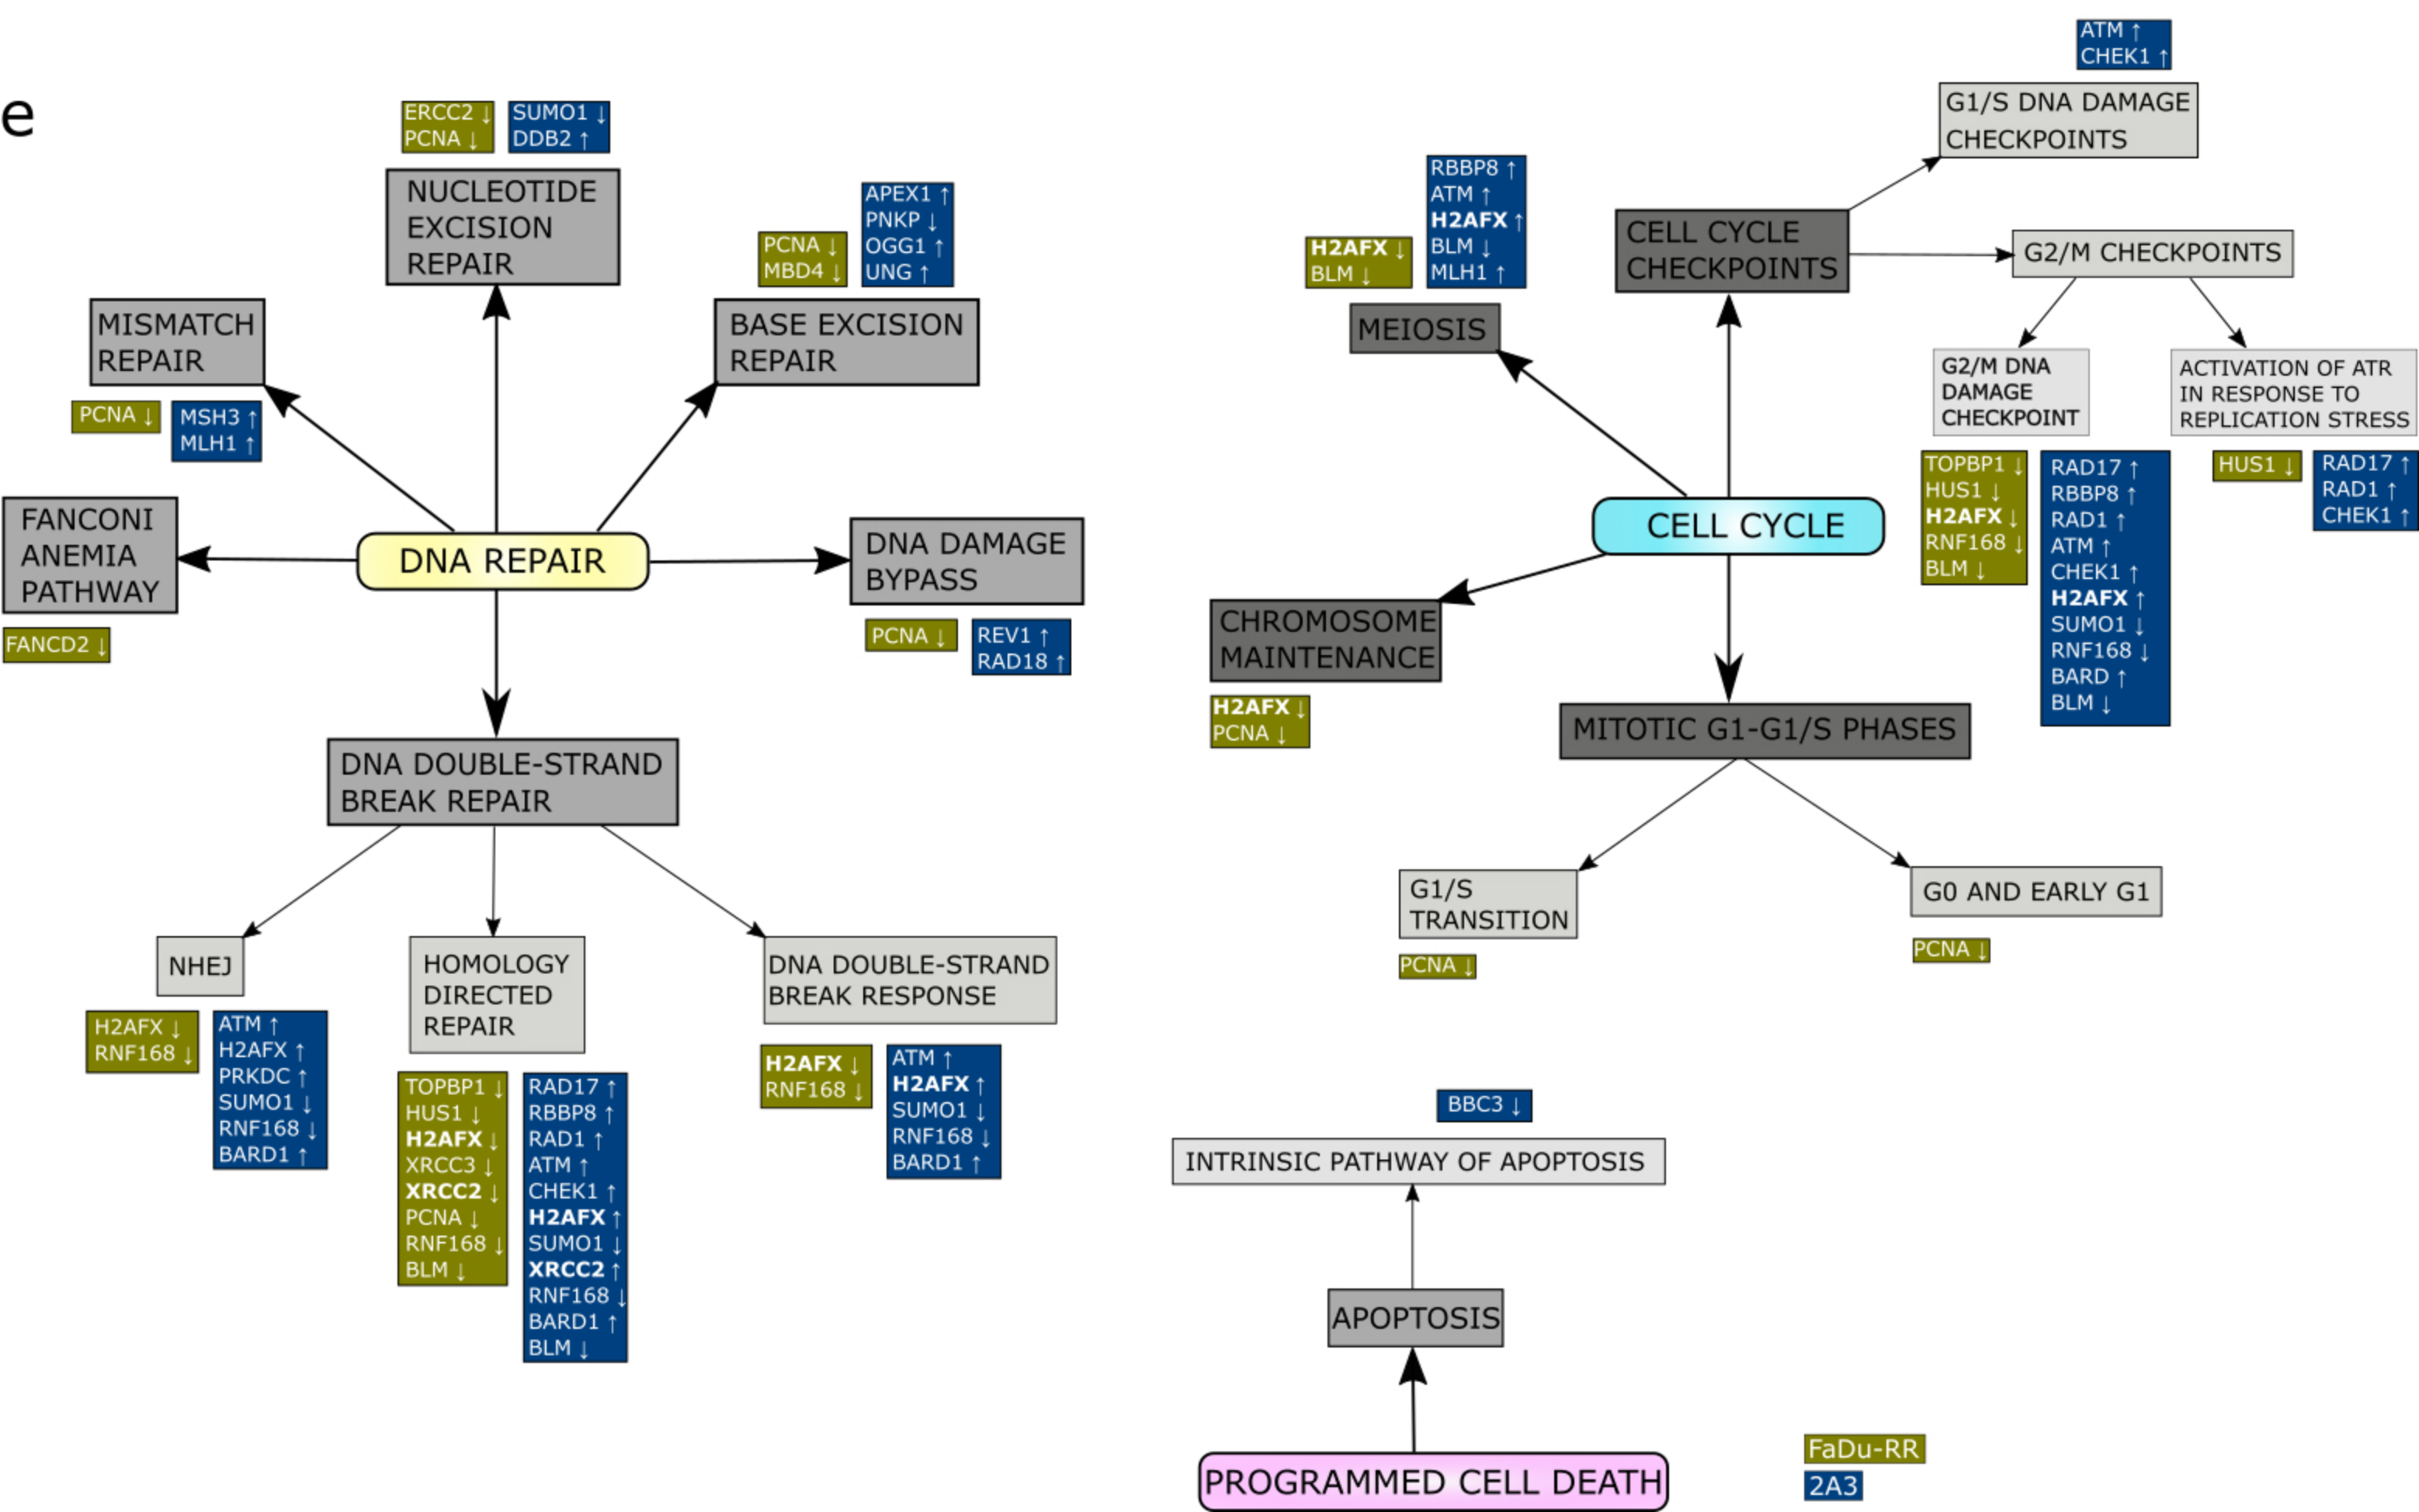

Supplement: MOESM12 [file 17440296]
