# Supplementary material for: Mechanisms of different response to ionizing irradiation in isogenic head and neck cancer cell lines
Source: Radiat Oncol. 2019 Nov 27;14:214. doi: 10.1186/s13014-019-1418-6 (PMC6882348; doi:10.1186/s13014-019-1418-6)
Supplement: Supplementary file 1 — Additional file 1. Final report of laboratory examination. [file 13014_2019_1418_MOESM1_ESM.pdf]

## FINAL REPORT OF LABORATORY EXAMINATION

Mörikestr. 28/3, D 71636 Ludwigsburg, Germany

+49 (0)7141 64 83585

[idxxbioanalytics-europe@idexx.com](mailto:idxxbioanalytics-europe@idexx.com)[www.idexxbioanalytics.eu/](http://www.idexxbioanalytics.eu/)

IDEXX BioAnalytics Case # 63647-2019

Received: 7/23/2019

Completed: 7/31/2019

## Submitted By

Vesna Todorovic  
Institute of Oncology Ljubljana  
Department of Experimental Oncology  
Zaloska 2  
Ljubljana SI-1000  
Slovenia

Phone: 38615879437

Email: [vtodorovic@onko-i.si](mailto:vtodorovic@onko-i.si); [Idexx-radil-results@idexx.com](mailto:Idexx-radil-results@idexx.com)

## Specimen Description

Species: human

Description: Cells

Number of Specimens/Animals: 2

| ID | Client ID | Species | ATCC # | OTHER 1                           | Specimen |
|----|-----------|---------|--------|-----------------------------------|----------|
| 1  | FaDu      | human   | HTB-43 |                                   | cell     |
| 2  | FaDu-RR   | human   |        | established from<br>FaDu (HTB-43) | cell     |

**Services/Tests Performed:** CellCheck 16 - human (16 Marker STR Profile and Inter-species Contamination Test) (1-2)**Genetic evaluation for:** Human 16-Marker STR Profile, Interspecies Contamination Test

**Summary:** Cell Check results are provided in the data results section for each sample. For human samples, an identity matching score above 80% indicates the sample is consistent with the cell line of origin. For human samples with less than an 80% matching score, please see individual comments for these samples in the detail section.

Please see the report for details.

## CELL CHECK

### Species-specific PCR Evaluation

| Species              | 1 | 2 |
|----------------------|---|---|
| mouse                | - | - |
| rat                  | - | - |
| human                | + | + |
| Chinese hamster      | - | - |
| African green monkey | - | - |

### Marker Analysis

| Marker Name    | 1              |                                 | 2              |                                 |
|----------------|----------------|---------------------------------|----------------|---------------------------------|
|                | Sample Results | FaDu (Nature 520:307-311, 2015) | Sample Results | FaDu (Nature 520:307-311, 2015) |
| AMEL           | NA             | NA                              | NA             | NA                              |
| CSF1PO         | 12             | 12                              | 12             | 12                              |
| D13S317        | 8, 9           | 8, 9                            | 8, 9           | 8, 9                            |
| D16S539        | 11             | 11                              | 11             | 11                              |
| D18S51         | 16             | 16                              | 16             | 16                              |
| D21S11         | 31.2           | 31.2                            | 31.2           | 31.2                            |
| D3S1358        | 17, 18         | 17, 18                          | 17             | 17, 18                          |
| D5S818         | 12             | 12                              | 12             | 12                              |
| D7S820         | 11, 12         | 11, 12                          | 11, 12         | 11, 12                          |
| D8S1179        | 13             | 13                              | 13             | 13                              |
| FGA            | 25             | 25                              | 25             | 25                              |
| Penta_D        | 11             | 11                              | 11             | 11                              |
| Penta_E        | 17, 19         | 17, 19                          | 19             | 17, 19                          |
| TH01           | 8              | 8                               | 8              | 8                               |
| TPOX           | 11             | 11                              | 11             | 11                              |
| vWA            | 15, 17         | 15, 17                          | 15, 17         | 15, 17                          |
| Identity Match | 100%           |                                 | > 80%          |                                 |
